# Supplementary material
Source: publisher figshare collection journal article supplement (https://tandf.figshare.com/articles/dataset/_/5349106)
Supplement: Supplementary file 1 [file 1]

## **SUPPLEMENTAL FILE 1**

### **Maternal PAH transfer and effects on offspring of copepods exposed to dispersed oil with and without oil droplets**

Bjørn Henrik Hansen<sup>1, 2,\*</sup>, Ann M. Tarrant<sup>3</sup>, Dag Altin<sup>4</sup>, Iurgi Salaberria<sup>2</sup>, Trond Nordtug<sup>1</sup>, Ida Beathe Øverjordet<sup>1</sup>

<sup>1</sup> SINTEF Ocean AS, Environmental Technology, 7465 Trondheim, Norway

<sup>2</sup> Norwegian University of Science and Technology, Department of Biology, 7469 Trondheim, Norway

<sup>3</sup> Woods Hole Oceanographic Institution, Biology Department, Woods Hole, USA

<sup>4</sup> BioTrix, 7022 Trondheim, Norway

#### **Supplemental Files:**

- Supplemental File 1 (this file): Contains Figure S1 and Figure S2
- Supplemental File 2 (separate file): Excel file (.xlsx) containing annotated lists of differentially expressed genes and associated statistics.
- Supplemental File 3 (separate file): Compressed (gzip) text file containing draft *de novo* transcriptome assembly in fasta format.

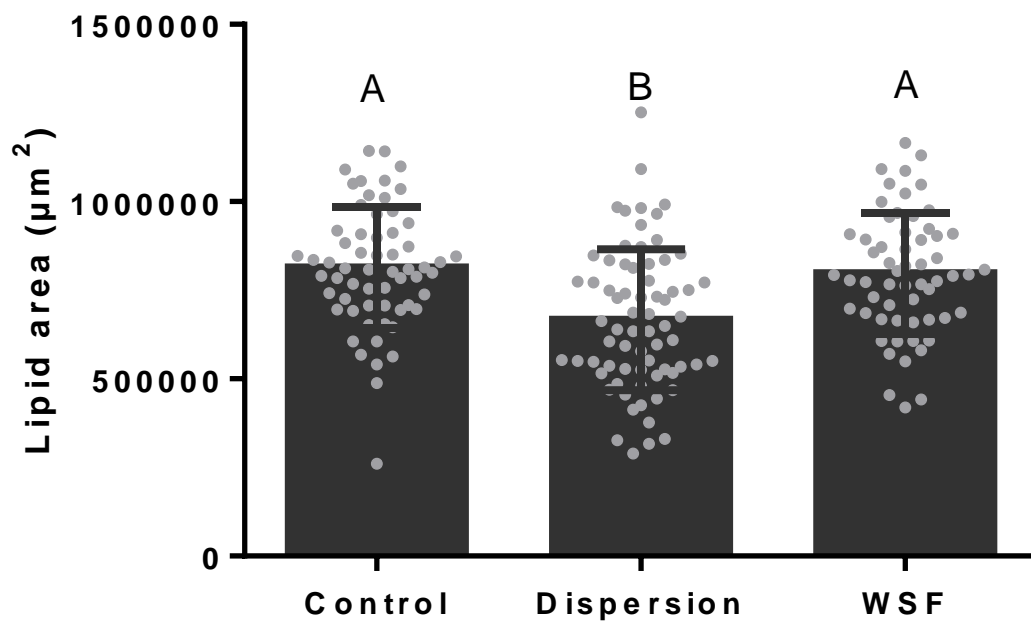

Figure S1: Projected 2D area of the lipid sac in female *Calanus finmarchicus* in the negative control series (seawater only), dispersion and WSF. The figures shows bar plot with average  $\pm$  STDEV as well as points representing all measured females (N=59-70). Letters denote significant differences between treatments  $p < 0.001$ .

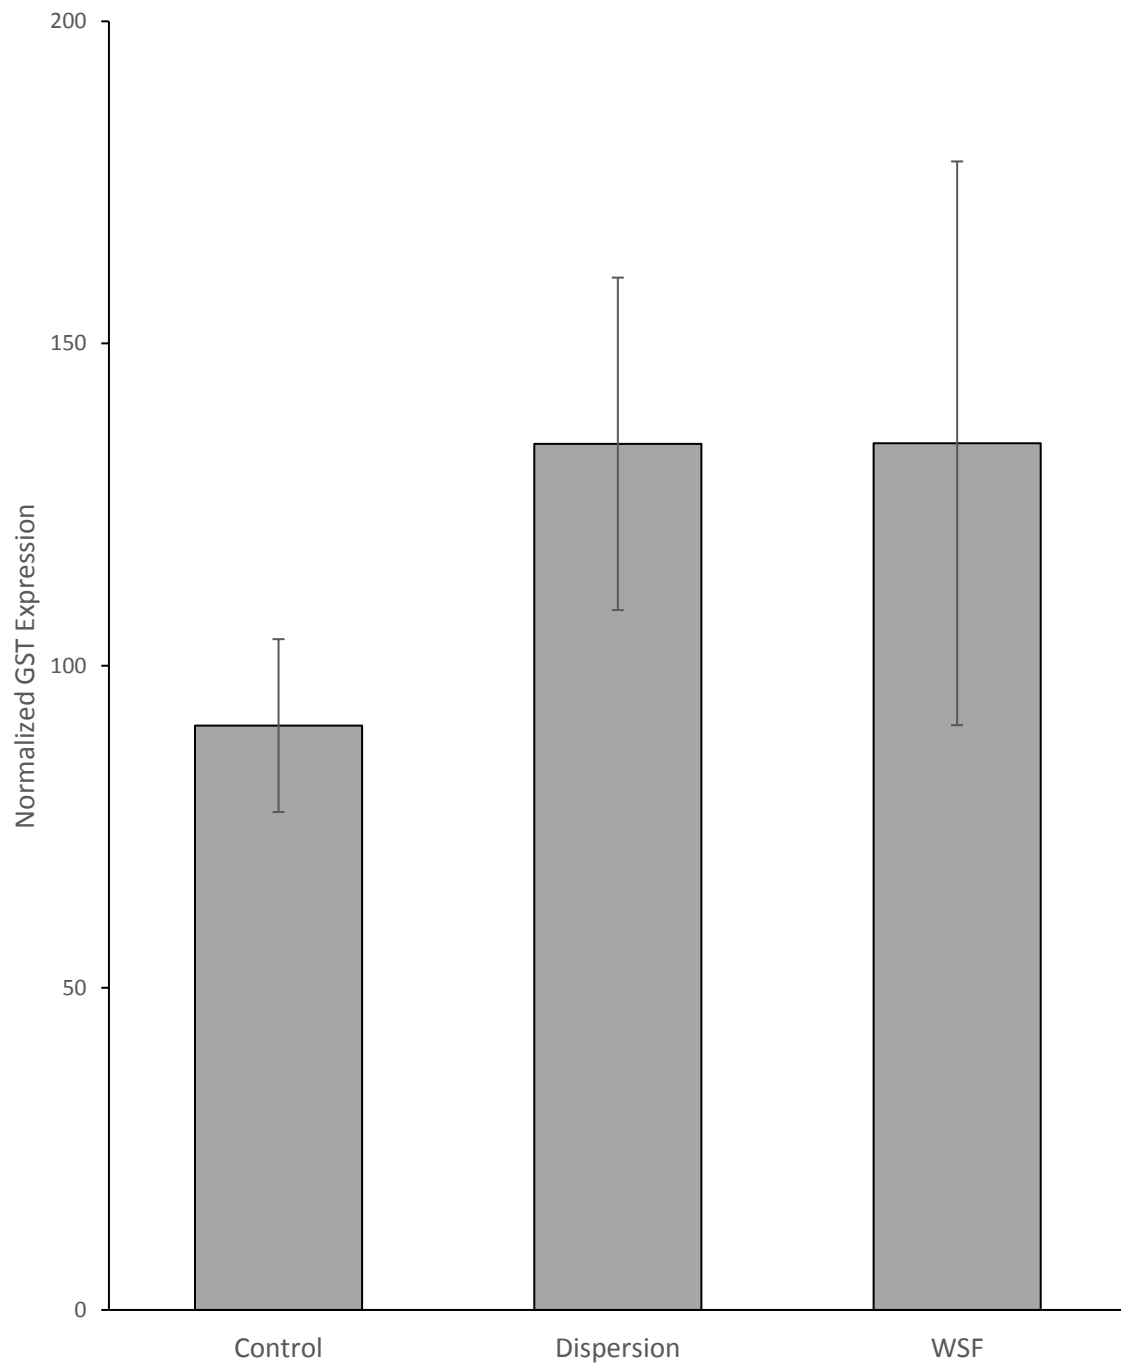

Figure S2: FPKM- and TMM-normalized GST expression (sequence c163217\_g1, within Supplemental File 3). Mean and standard error of three replicates. While there is a trend toward up-regulation in both oil treatments, the difference is not statistically significant ( $p > 0.05$ ).
